# Supplementary material
Source: publisher site journal article supplement (https://www.spandidos-publications.com/1985/downloadSupplementary)
Supplement: Supplementary file 1 [file downloadSupplementary]

Figure S1. Clinical images of patients participating in the oral health assessment. Each of the four items evaluated ('hygiene', 'xerostomia', 'mucositis' and 'occlusion') received a score from 0 (excellent assessment) to 3 points (extremely poor assessment). The total score ranged from 0 points (excellent oral health) to 12 points (worst oral health).

| Category   | Numerical and descriptive ratings (Prompt non-invasive oral assessment)                           |                                                                                                                          |                                                                                                                                             |                                                                                                                          |
|------------|---------------------------------------------------------------------------------------------------|--------------------------------------------------------------------------------------------------------------------------|---------------------------------------------------------------------------------------------------------------------------------------------|--------------------------------------------------------------------------------------------------------------------------|
|            | 0<br>Excellent                                                                                    | 1<br>Slight dysfunction                                                                                                  | 2<br>Moderate dysfunction                                                                                                                   | 3<br>Severe dysfunction                                                                                                  |
| Hygiene    | <br>Clean        | <br>Slight local debris                 | <br>Moderate local debris                                 | <br>General debris, decay             |
| Xerostomia | <br>Watery       | <br>Thick or Ropy                       | <br>Little                                                | <br>Absent                            |
| Mucositis  | <br>Pink, moist | <br>Slight red or coated,<br>no ulcers | <br>Moderate red or coated, ulcer<br>Sight-moderate pain | <br>Ulcer with bleeding<br>Sever pain |
| Occlusion  | 4 occlusal supporting zones (OSZs)                                                                | 2-3 OSZs                                                                                                                 | 1 OSZ                                                                                                                                       | No OSZs                                                                                                                  |

Table SI. Pneumonia-causing bacteria detected among the 13 patients in the detection group in the present study.

| Patients [case no. (#), sex/age (years), albumin levels (g/dl)] | MSSA | MRSA | Kleb | Psend | Ente | Coli | Influ | Pnue | Gram-negative bacilli |
|-----------------------------------------------------------------|------|------|------|-------|------|------|-------|------|-----------------------|
| #11, F/38, 3.3                                                  |      | 2+   |      | 2+    |      |      |       |      | 2+                    |
| #15, F/53, 2.6                                                  | 3+   |      |      |       | 1+   |      |       |      | 1+                    |
| #20, M/76, 2.2                                                  |      |      | 2+   | 2+    |      |      |       |      | 2+                    |
| #22, M/62, 3.3                                                  |      |      |      | 1+    |      |      |       | 1+   | 1+                    |
| #26, F/74, 2.9                                                  |      |      |      | 2+    |      |      |       |      | 2+                    |
| #27, M/77, 2.3                                                  |      |      | 1+   | (+)   |      |      |       |      | 1+                    |
| #36, M/68, 2.3                                                  |      |      |      | (+)   |      |      |       |      | (+)                   |
| #39, F/63, 1.7                                                  |      |      |      | 3+    |      |      |       |      | 3+                    |
| #41, F/53, 2.8                                                  |      |      |      | 2+    |      |      |       |      | 2+                    |
| #44, F/77, 3.5                                                  | 1+   |      |      |       |      |      |       |      | -                     |
| #45, M/64, 3.2                                                  | 1+   |      |      |       |      |      |       |      | -                     |
| #50, M/29, 3.8                                                  |      | 2+   |      |       |      |      |       |      | -                     |
| #54, M/92, 1.9                                                  | (+)  | 1+   |      |       | 1+   |      |       |      | 1+                    |

The 8 species of pneumonia-causing bacteria examined were the following: Methicillin-sensitive *Staphylococcus aureus* (MSSA), Methicillin-resistant *Staphylococcus aureus* (MRSA), *Klebsiella pneumoniae* (Kleb), *Pseudomonas Aeruginosa* (Psend), *Enterobacter cloacae* (Ente), *Escherichia coli* (Coli), *Haemophilus Influenzae* (Influ), *Streptococcus pneumoniae* (Pnue). 3+, colonies were prevalent throughout the Petri dish; 2+, colonies occupied two-thirds of the Petri dish; 1+, colonies occupied one-third of the Petri dish; +, the number of colonies in the Petri dish did not exceed 20. The Gram-negative bacilli that were found to be highly proliferative were also scored and are shown in the right column. The group in which only Gram-negative bacilli (n=6) were detected had lower albumin levels than the group in which only Gram-positive cocci (n=3) were detected (mean serum albumin levels were 2.37 and 3.58 g/dl, respectively).
